# Supplementary material for: Stabilizing structures of cysteine-containing crystals with respect to variations of temperature and pressure by immobilizing amino acid side chains
Source: Royal Society of Chemistry journal article supplement (doi:10.1039/c2ce25241d), 2012-01-01
Supplement: c2ce25241d.pdf [file c2ce25241d.pdf]

### Supplementary information

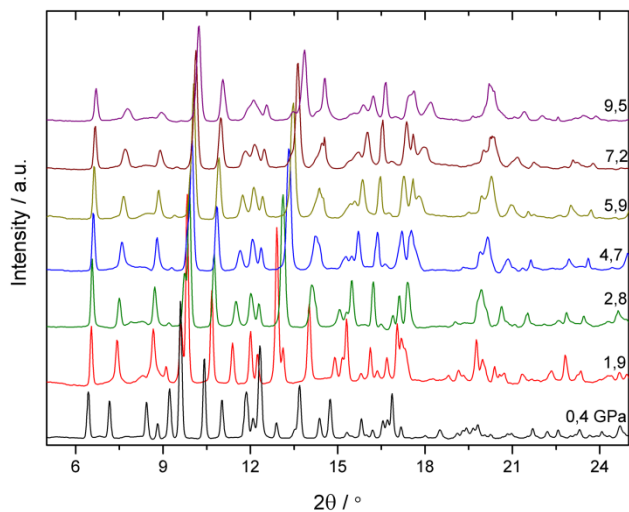

Fig. S1 X-ray diffraction powder patterns of *N*-acetyl-L-cysteine at selected pressures.

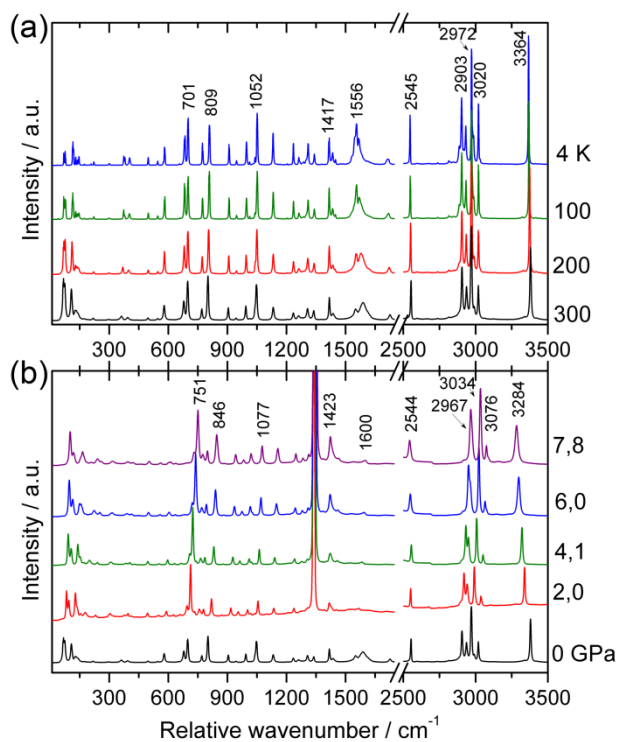

Fig. S2 Raman spectra of *N*-acetyl-L-cysteine on cooling (a) and on increasing pressure (b).

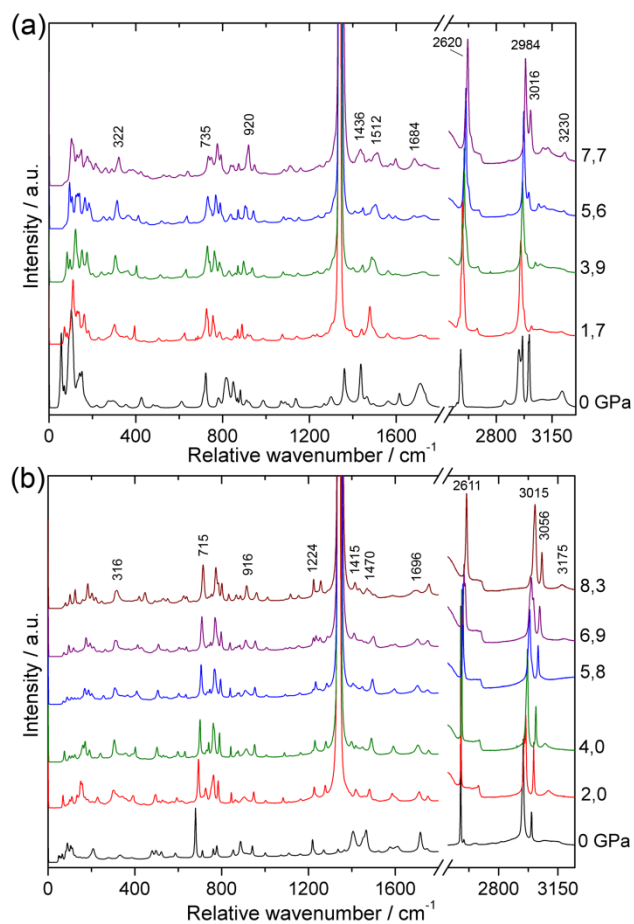

Fig. S3 Raman spectra of bis(DL-cysteinium oxalate) (a) and DL-cysteinium semioxalate (b) on increasing pressure
